# Supplementary material for: Technical note: How well do evapotranspiration partitioning approaches perform in moss-covered wetlands?
Source: Copernicus journal article supplement (doi:10.5194/egusphere-2025-4252), 2025-09-30
Supplement: Supplementary file 1 [file egusphere-2025-4252-supplement.pdf]

**Supplement. Site Photos Illustrating Canopy Conditions of the Four Study Sites**

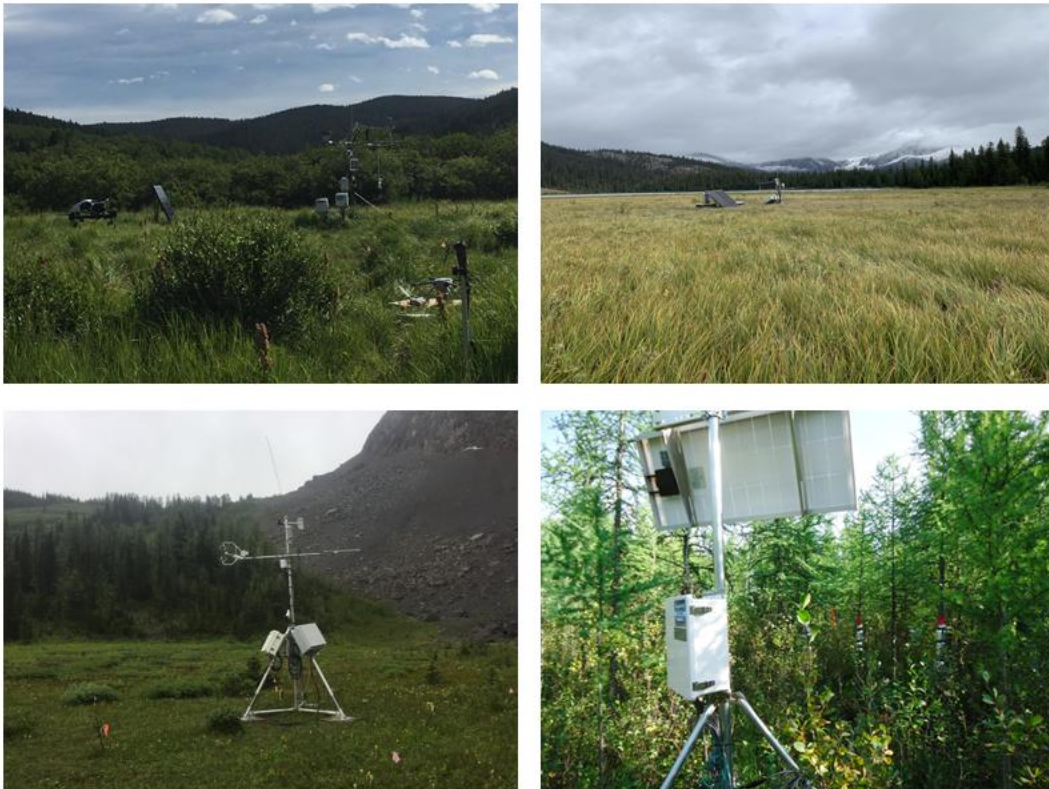

**Figure S1: Photographs showing canopy conditions at the four study sites. The upper left image shows Sibbald, characterized by layered canopy with scattered shrubs and dense sedges. The upper right is Burstall, featuring very sparse shrubs and dense sedges. The bottom left is Bonsai, presenting clusters of trees and mixed understory vegetation. The bottom right is Poplar, which has a denser, more closed canopy formed by coniferous trees.**
